# Supplementary material for: Cas9-mediated gene editing in the black-legged tick, Ixodes scapularis, by embryo injection and ReMOT Control
Source: PubMed Central journal article supplement — iScience. 2022 Feb 15;25(3):103781. doi: 10.1016/j.isci.2022.103781 (PMC9076890; doi:10.1016/j.isci.2022.103781), 2022-02-15
Supplement: mmc1.pdf [file mmc1.pdf]

iScience, Volume 25

## Supplemental information

### Cas9-mediated gene editing

in the black-legged tick, *Ixodes scapularis*,

by embryo injection and ReMOT Control

Arvind Sharma, Michael N. Pham, Jeremiah B. Reyes, Randeep Chana, Won C. Yim, Chan C. Heu, Donghun Kim, Duverney Chaverra-Rodriguez, Jason L. Rasgon, Robert A. Harrell II, Andrew B. Nuss, and Monika Gulia-Nuss

## Supplemental Materials

### Results; Materials and Methods

**Figure S1. Schematic of the operating procedure developed for *Ixodes scapularis* embryo injections, Related to STAR Methods and Figure 1.**

**Figure S2. Embryo injection protocol and successful embryo injections, Related to STAR Methods and Figure 1.**

Optional legend: (A) Eggs deposited from a control (left) and from a female with a dissected Gene's organ (right). (B) Slide setup used for securing eggs for embryo injections. (C) *I. scapularis* dechorionated control embryos (no injection) and (D) embryos injected with green food color. (E) Expression of the CAGGS promoter-reporter construct in injected embryos. Embryos injected with green food color (without promoter construct) have no visible fluorescence whereas CAGGS injected embryos show reporter expression in multiple cells.

**Figure S3. Alignment of *ProbP* mutant sequences with possible inversion, Related to STAR Methods and Figure 2.**

Optional legend: (A) Sequence alignment in graphic format in NCBI with BLAST tool shows near-perfect match with *Ixodes scapularis* homeotic protein *Proboscipedia* (LOC8038072). The sequence matches two parts with plus/plus and plus/minus. (B) Dot plot of *ProbP* sequence also showing sequence match with possibly inverted sequence. (C) Chromatogram of L1 Sanger sequencing showing mixed bp in the region of potential inversion.

**Figure S4. Summary of *Proboscipedia* Illumina deep sequencing data, Related to STAR Methods and Figure 2.**

Optional legend: Animals were injected with sgRNAs 1-4. Indel percentage is on the Y-axis. The X-axis depicts predicted Cas9 cut site (position 0) and sequences up- and down-stream of the cut site.

**Figure S5. Amino acid sequences of *Proboscipedia* showing deletions in ReMOT Control edited larvae, Related to STAR Methods and Figures 2 and 5.**

Optional legend: A) Multiple sequence alignment of amino acid sequences of representative homozygous mutants (R4, R6, and R11) depicting in-frame deletion. B) Multiple sequence alignment of amino acid sequences of a representative homozygous mutant depicting frameshift deletion. R10 is translated amino acid sequence from DNA sequencing, R10\* is the predicted amino acid sequence with the frame shift. Alignments were generated using Clustal Omega (Sievers et al., 2011).

**Table S1: Single guide RNAs designed to target genes in *Ixodes scapularis*, Related to Figure 1**

### Materials and Methods

**Table S2: Primers used to PCR amplify the respective genes from G<sub>0</sub> larvae, Related to Figures 2, 3, and 5 \*primer used for the sequencing.**

**Figure S1**

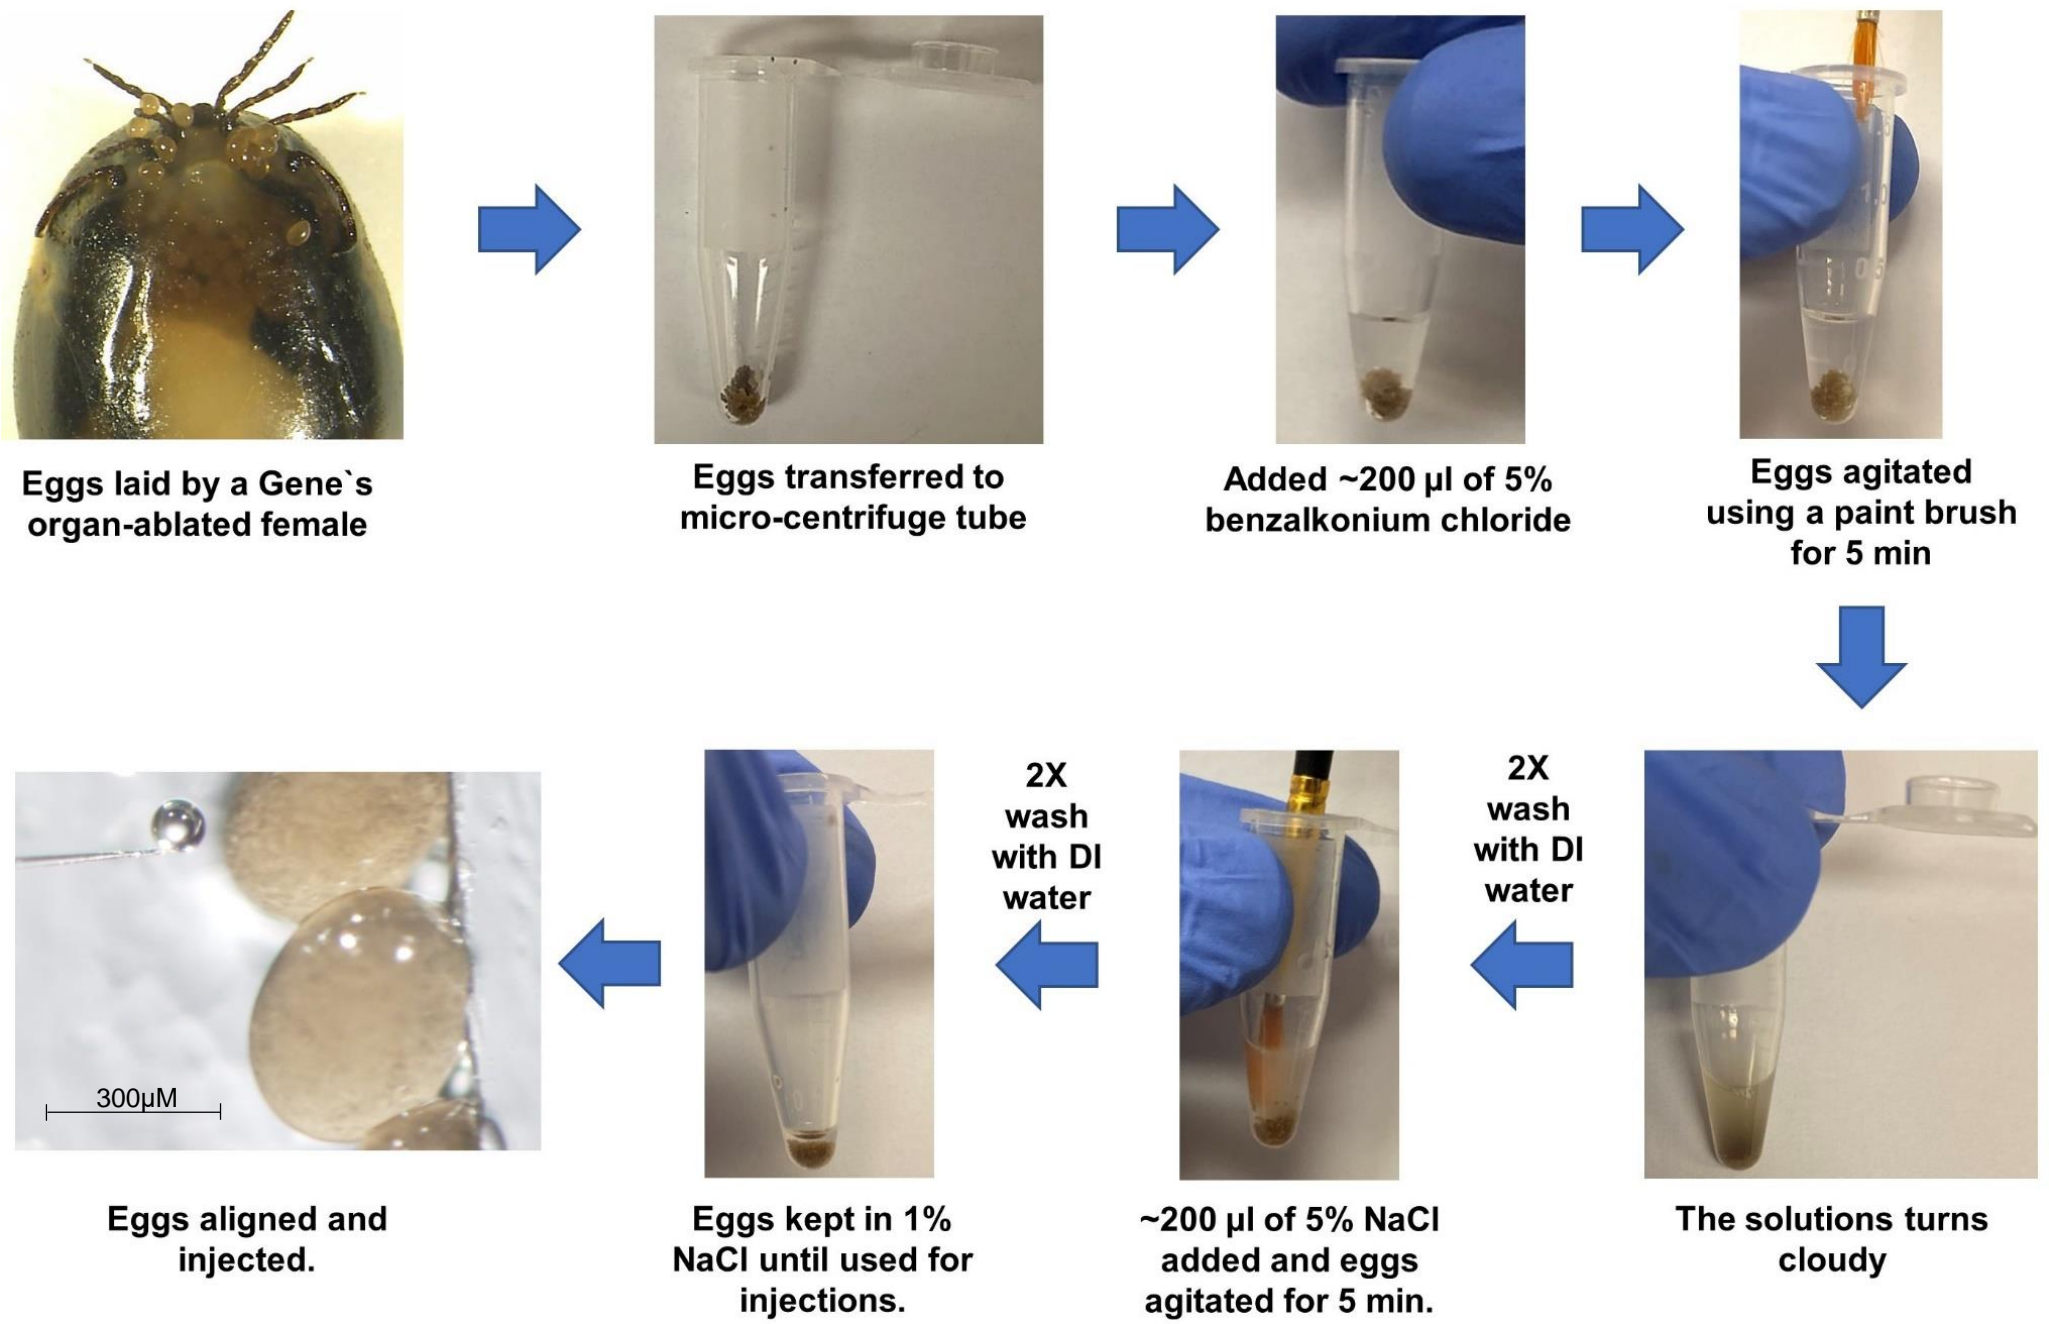

**Figure S2**

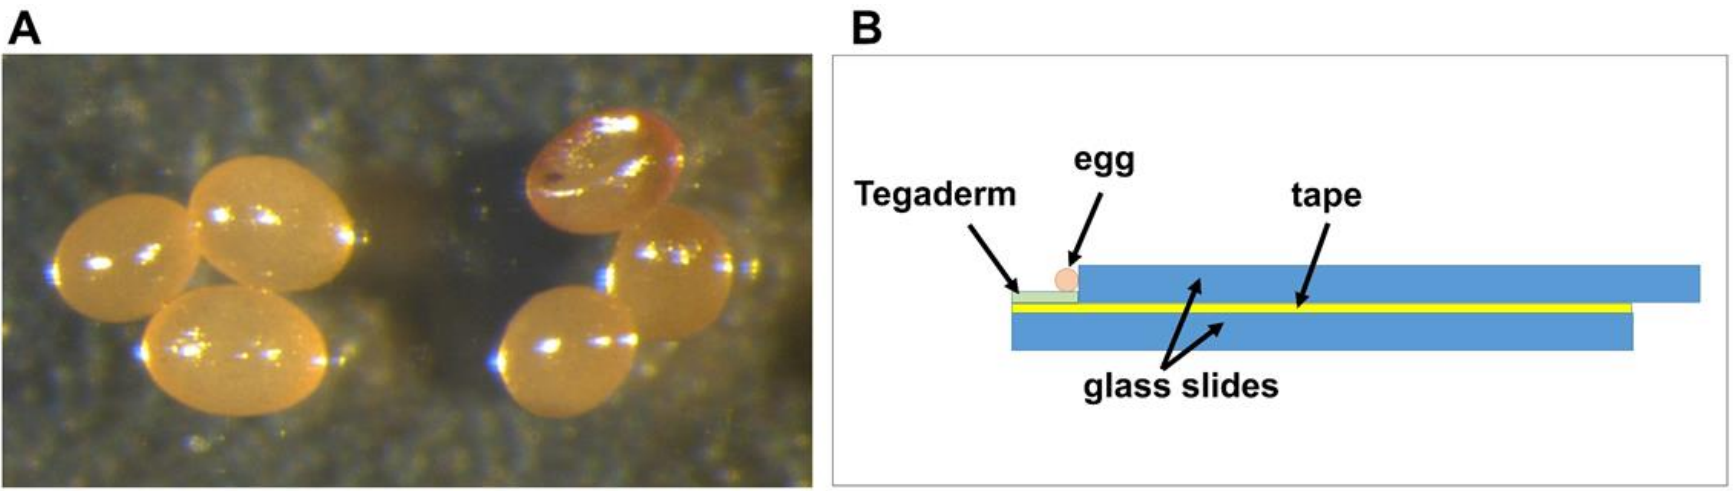

Eggs from a control female

Partially waxed eggs from a Gene's organ ablated female

Injection setup: side view

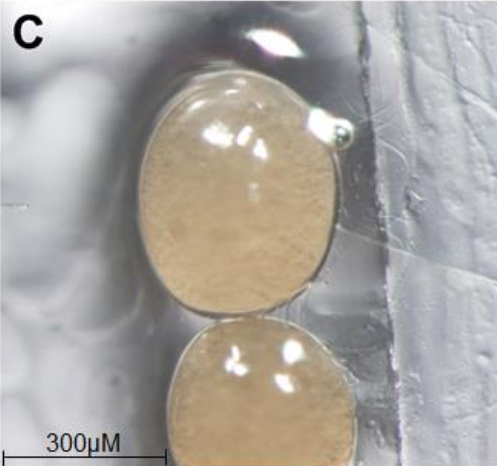

Dechorionated controls

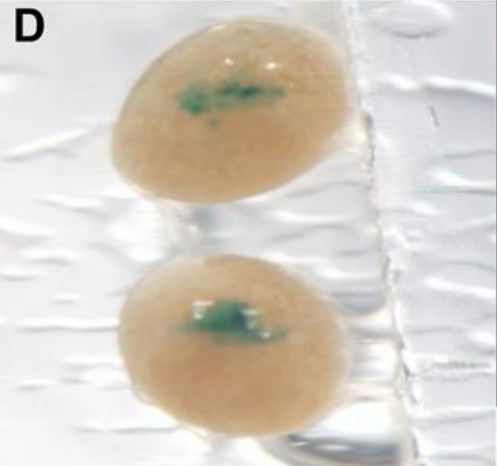

Dye injections

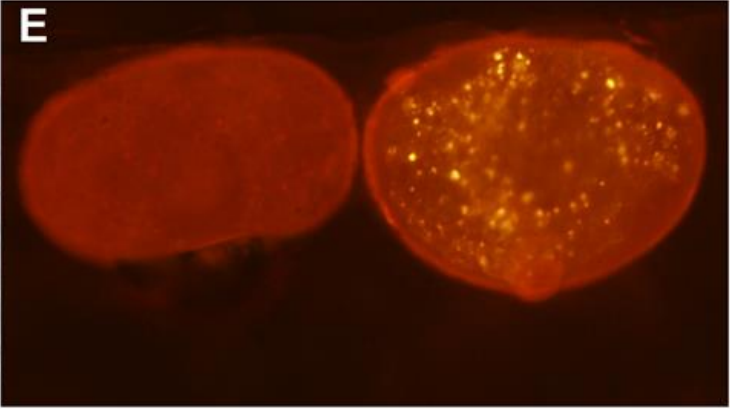

Control

CAGGS construct injected

Figure S3

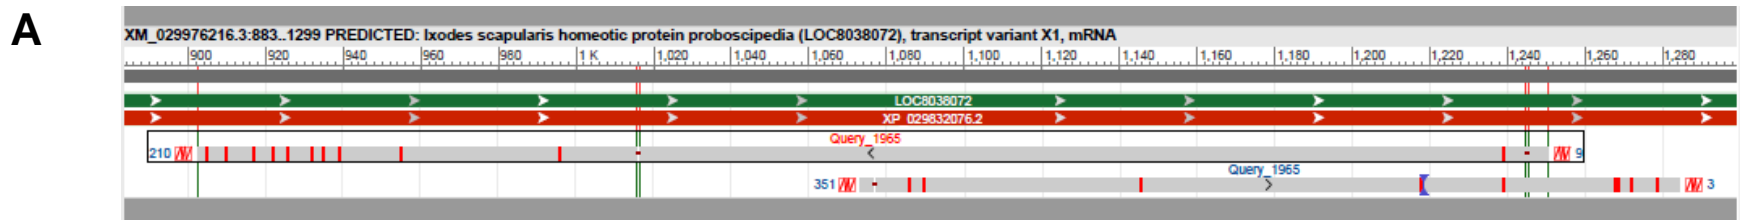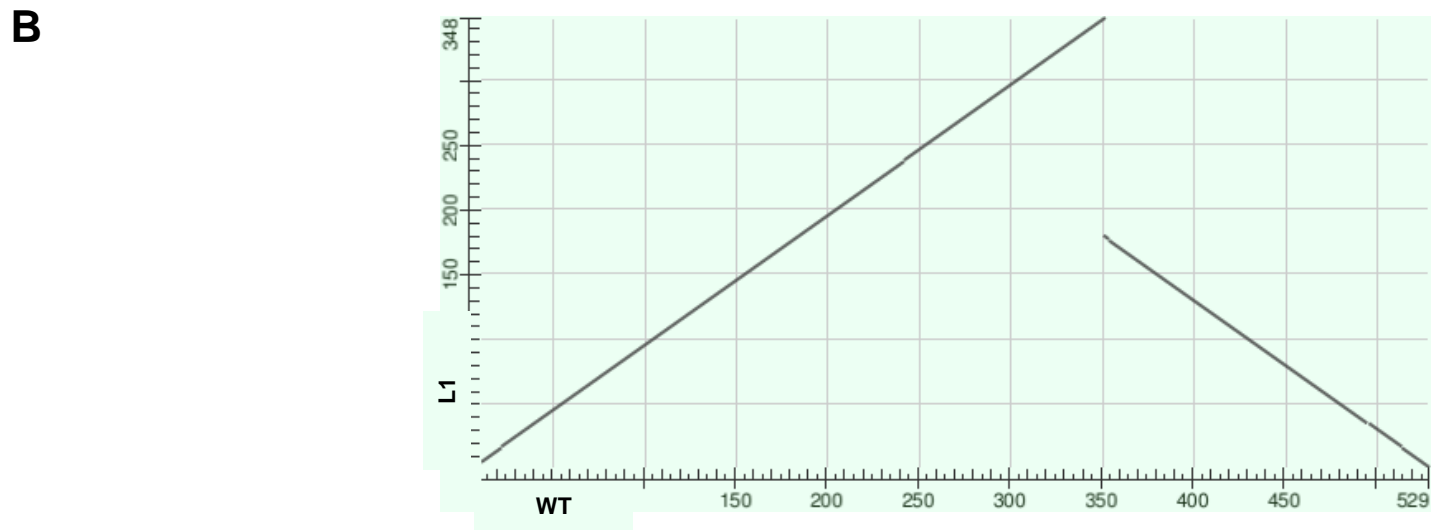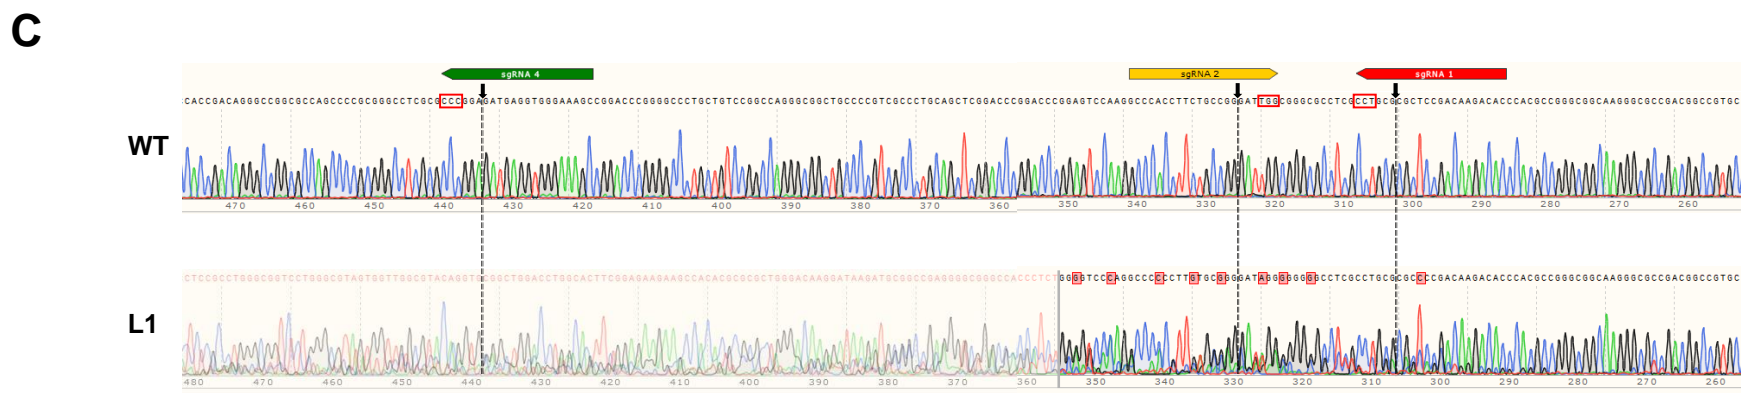

Figure S4

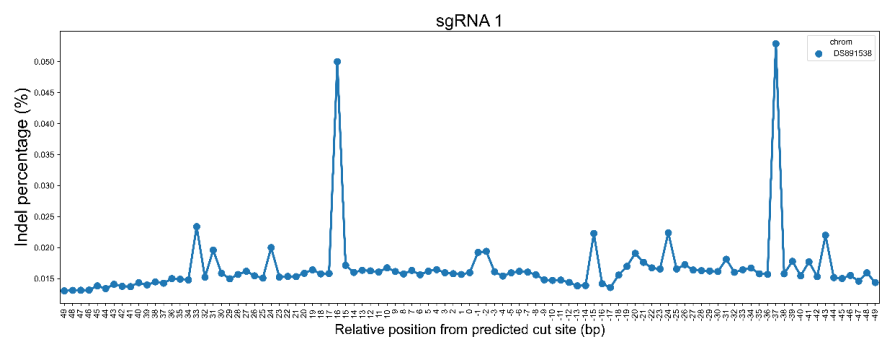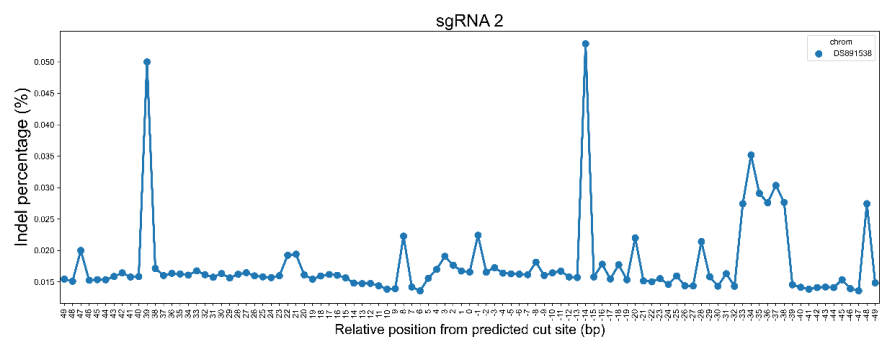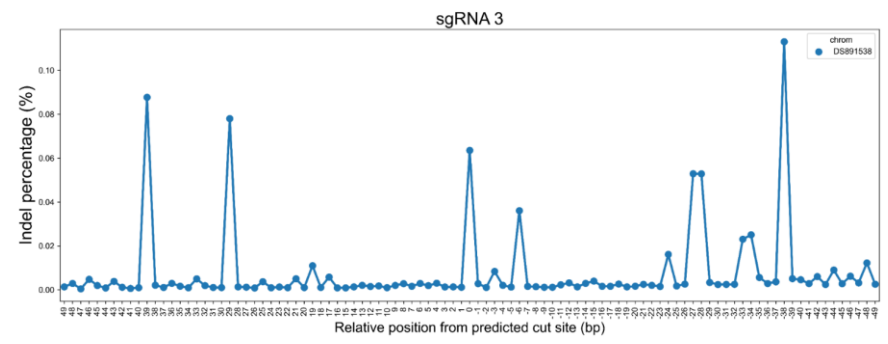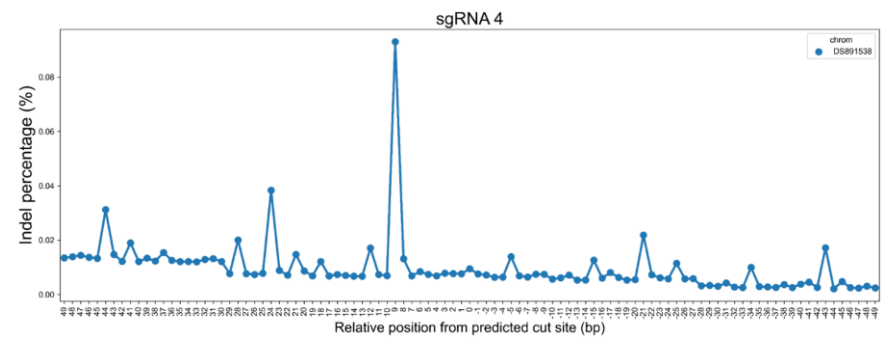

Figure S5

A

### Homozygous In-Frame Deletion

```

WT TMSKQDEKNGDAASEGEASSVEATDRAGASPAGLAPGDEVGKPDGPCCPARAAAPSPCSSDPDPEKHAHLLPGLAGASPARSDKTPTPGGKGADGRAASPAAPRLLSGKAPALCSLD
R4 SMMSKQDEKNGDAASEGEASSVEATDRAGA-----SPAAPRLLSGKAPALCSLD
R6 -MMSKQDEKNGDAASEGEASSVEATDRAGASPAGLAPGDEVGKPDGPCCPARAAAPSPCSSDPDPEK-----APALCSLD
R11 -MMSKQDEKNGDAASEGEASSVEATDRAGA-----SPAAPRLLSGKAPALCSLD
*****

```

B

### Homozygous Frameshift Deletion

```

WT TMSKQDEKNGDAASEGEASSVEATDRAGASPAGLAPGDEVGKPDGPCCPARAAAPSPC----SSDPDPEKHAHLL--PGLAG--ASPARSDKTPTPGGKGADGRAASPAAPRLLSGK
R10 TMSKQDEKNGDAASEGEASSVEATDRAGASPAGLAPGDEVGKPDGPCCPARPPLSAPSTVVCARRGSPAPRPHLILV PARVWLLLR TARSSRTCTPTTT-----PRTAQ--
R10* TMSKQDEKNGDAASEGEASSVEATDRAGASPAGLAPGDEVGKPDGPCCPARPPLSAPSTVVCARRGSPAPRPHLILV PARVWLLLR TARSSRTCTPTTT-----PRTAQ--
*****
; . : * : ** : * . ** . : * ** . ** .
WT APALCSLDGGLCPQRVASPSAASYPCPSARVASSPNCQVQPHLYANHQAQDRPGGGPMQGYNGQCATAATAVHRGQQSPGVYCAATYRSPPAASA AVGPQVAAATGAQGPPQVGSNSYAG
AEVPCR-----
AEVPCRATTGSAP-----LPPPCTGDSSR--LESTARPRTLRRRPAQRSGHR-----S----RPPQVPRGLRR*-----
* . *

```

**Table S1 (Related to Figure 1): Single guide RNAs designed to target genes in *Ixodes scapularis*.**

| sgRNA name                               | Length (bp) | Target Sequence      | PAM |
|------------------------------------------|-------------|----------------------|-----|
| <b><i>Proboscipedia</i> (ISCW021086)</b> |             |                      |     |
| sgRNA 1                                  | 19          | GTGTCTTGTCCGAGCGCGC  | AGG |
| sgRNA 2                                  | 19          | GCCACCTTCTGCCGGGAT   | TGG |
| sgRNA 3                                  | 19          | GTTGGCGTACAGGTGCGGC  | TGG |
| sgRNA 4                                  | 19          | GCTTTCCACCTCATCTCC   | GGG |
| sgRNA 5                                  | 20          | ACAAGTACCTGTGTCCGCCT | CGG |
| sgRNA 6                                  | 20          | CCGAGCGCCAAGTCAAGGTG | TGG |
| sgRNA 7                                  | 20          | GGGGCTGGCGCCGGCCCTGT | CGG |
| <b><i>Chitinase</i> (ISCW003950)</b>     |             |                      |     |
| sgRNA 1                                  | 20          | GTATCGAGACGTGTCTCCAT | CGG |
| sgRNA 2                                  | 20          | GACCCGGTAGTAGGACCAGC | TGG |

**Table S2 (Related to Figures 2, 3, and 5): Primers used to PCR amplify the respective genes from G<sub>0</sub> larvae.**

\*primer used for the sequencing

| Primer name                              | Sequence (5'-3')       |
|------------------------------------------|------------------------|
| <b><i>Proboscipedia</i> (ISCW021086)</b> |                        |
| IscprobF1                                | CAATTTCTGCCGTTTTCTTGAT |
| IscprobF2                                | CTGCCGTTTTCTTGATTAACAC |
| IscprobR 1                               | ATAGCTGTTGCTGCCTACCTG  |
| IscprobR 2*                              | GTAGACTCCAGGCGACTGCT   |
| <b><i>Proboscipedia</i> (ISCW021086)</b> |                        |
| IscprobF1                                | CAATTTCTGCCGTTTTCTTGAT |
| IscprobR 1                               | ATAGCTGTTGCTGCCTACCTG  |
| Iscprob F2                               | GCGACAGACGATGATGAGCA   |
| Iscprob R2*                              | GTAGACTCCAGGCGACTGCT   |
| <b><i>Chitinase</i> (ISCW003950)</b>     |                        |
| IschtF*                                  | AGACATGCTTAGCCGCTTTC   |
| IschtR                                   | TGTGGGCTTGAAAAATCTAGG  |
